# Supplementary material for: NMR “Finger Prints” of N-Heterocyclic Carbenes, DFT Analysis: Scopes and Limitations
Source: MDPI journal article supplement (doi:10.3390/molecules28237729), 2023-11-23
Supplement: s1 [file s1]

Supplementary Information for:

# NMR “finger prints” of N-heterocyclic carbenes. DFT analysis. Scopes and limitations.

*Svetlana A. Kondrashova, Shamil K. Latypov\**

Arbuzov Institute of Organic and Physical Chemistry, FRC Kazan Scientific Center of RAS,  
Kazan, Tatarstan 420088, Russian Federation

\* Correspondence: *lsk@iopc.ru*; Tel.: +7-(843)-2731892; Fax: +7-(843)-2732253

## Table of contents

## pages

|                                                                                                                                                                                                                                                                                                                                                                                                                                                          |    |
|----------------------------------------------------------------------------------------------------------------------------------------------------------------------------------------------------------------------------------------------------------------------------------------------------------------------------------------------------------------------------------------------------------------------------------------------------------|----|
| Table S1. Experimental (in CDCl <sub>3</sub> ) and calculated <sup>77</sup> Se NMR shifts (ppm) for main set of carbene·Se adducts ( <b>1</b> ·Se- <b>24</b> ·Se). .....                                                                                                                                                                                                                                                                                 | 3  |
| Figure S1. Different forms of <sup>1</sup> I <sup>Pr</sup> <sup>Me</sup> ·Se ( <b>6</b> ·Se) with corresponding distances (Å) between <sup>1</sup> Pr hydrogen's and Se. ....                                                                                                                                                                                                                                                                            | 5  |
| Table S2. <sup>77</sup> Se NMR shifts (ppm) for <b>ICy</b> ( <b>1</b> Se), <b>IDD</b> ( <b>2</b> Se) and <sup>1</sup> I <sup>Pr</sup> <sup>Me</sup> ( <b>6</b> Se) Se-adducts. Experimental (in CDCl <sub>3</sub> ) and calculated <sup>a</sup> CSs for different forms with corresponding energies (in parenthesis). ....                                                                                                                               | 5  |
| Figure S2. Correlation of calculated vs. experimental <sup>77</sup> Se NMR shifts for the main set of carbene Se adducts ( <b>1</b> ·Se - <b>24</b> ·Se) (a - PBE0/6-311G(2d,2p)//PBE0/6-311+G(2d) level, b - PBE0/{6-311G(2d,2p);Se(NMR-DKH)}/{PBE0/{6-311+G(2d);Se(NMR-DKH)}}, c - PBE0/{6-311G(3df,2p);Se(NMR-DKH)}/{PBE0/{6-311+G(3df,2p);Se(NMR-DKH)}} level).....                                                                                  | 6  |
| Figure S3. Correlation of calculated vs. experimental <sup>77</sup> Se NMR shifts for the main set of carbene Se adducts ( <b>1</b> ·Se - <b>24</b> ·Se) (a - PBE/6-311G(2d,2p)//PBE0/6-311+G(2d) level, b - PBE50/6-311G(2d,2p)//PBE0/6-311+G(2d) level). ....                                                                                                                                                                                          | 6  |
| Table S3. Se-C bond lengths (L, Å) and some valence angles (°) for <b>1</b> ·Se, <b>5</b> ·Se, <b>7</b> ·Se, <b>13</b> ·Se, and <b>18</b> ·Se calculated at DFT level of theory (PBE0) with different basis sets. ....                                                                                                                                                                                                                                   | 7  |
| Table S4. Experimental (in CDCl <sub>3</sub> ) and calculated at non-relativistic and fully relativistic mDKS levels of theory <sup>77</sup> Se NMR shifts (ppm) for selected carbene·Se adducts ( <b>1</b> ·Se - <b>2</b> ·Se, <b>4</b> ·Se - <b>7</b> ·Se, <b>13</b> ·Se - <b>14</b> ·Se, <b>17</b> ·Se - <b>20</b> ·Se). ....                                                                                                                         | 8  |
| Figure S4. Correlation of calculated vs. experimental <sup>77</sup> Se NMR shifts for the main set of carbene Se adducts (a - <b>1</b> ·Se - <b>2</b> ·Se, <b>4</b> ·Se - <b>7</b> ·Se, <b>13</b> ·Se - <b>14</b> ·Se, <b>17</b> ·Se - <b>20</b> ·Se, TZ_DZ//PBE0/6-311+G(2d) level, b - <b>1</b> ·Se - <b>2</b> ·Se, <b>6</b> ·Se, <b>13</b> ·Se - <b>14</b> ·Se, <b>17</b> ·Se - <b>19</b> ·Se, TZ_DZ//PBE0/{6-311+G(3df,2p);Se(NMR-DKH)} level). .... | 9  |
| Table S5. Experimental (in CDCl <sub>3</sub> ) and calculated <sup>a</sup> <sup>77</sup> Se NMR shifts (ppm) for some carbene·Se adducts ( <b>13</b> ·Se- <b>14</b> ·Se, <b>17</b> ·Se) and their associates with chloroform. ....                                                                                                                                                                                                                       | 9  |
| Table S6. Experimental (in CDCl <sub>3</sub> unless otherwise stated) and calculated <sup>77</sup> Se NMR shifts (ppm) for extended set of carbene·Se adducts ( <b>1</b> ·Se - <b>38</b> ·Se). ....                                                                                                                                                                                                                                                      | 10 |

|                                                                                                                                                                                                                                                                                                                                                                                                                                     |    |
|-------------------------------------------------------------------------------------------------------------------------------------------------------------------------------------------------------------------------------------------------------------------------------------------------------------------------------------------------------------------------------------------------------------------------------------|----|
| Table S7. Experimental (in C <sub>6</sub> D <sub>6</sub> unless otherwise stated) and calculated <sup>31</sup> P NMR shifts (ppm) for main set of carbene·PPh adducts ( <b>3</b> ·PPh, <b>5</b> ·PPh, <b>11</b> ·PPh, <b>13</b> ·PPh, <b>26</b> ·PPh- <b>29</b> ·PPh, <b>35</b> ·PPh, <b>39</b> ·PPh- <b>40</b> ·PPh).....                                                                                                          | 12 |
| Table S8. Experimental (in C <sub>6</sub> D <sub>6</sub> unless otherwise stated) and calculated <sup>31</sup> P and <sup>13</sup> C NMR shifts (ppm) for extended set of carbene·PPh adducts ( <b>3</b> ·PPh, <b>5</b> ·PPh, <b>11</b> ·PPh, <b>13</b> ·PPh, <b>25</b> ·PPh- <b>29</b> ·PPh, <b>35</b> ·PPh, <b>37</b> ·PPh, <b>39</b> ·PPh- <b>44</b> ·PPh). ....                                                                 | 13 |
| Figure S5. Correlation of calculated (PBE0/6-311G(2d,2p)//PBE0/6-31+G(d) level) vs. experimental <sup>31</sup> P NMR shifts for extended set of carbene PPh adducts ( <b>3</b> ·PPh, <b>5</b> ·PPh, <b>11</b> ·PPh, <b>13</b> ·PPh, <b>25</b> ·PPh- <b>29</b> ·PPh, <b>35</b> ·PPh, <b>37</b> ·PPh, <b>39</b> ·PPh- <b>44</b> ·PPh).....                                                                                            | 15 |
| Table S9. Experimental (in C <sub>6</sub> D <sub>6</sub> ) and calculated <sup>a</sup> <sup>13</sup> C NMR shifts (ppm) for set of carbenes ( <b>3</b> , <b>5</b> , <b>11</b> , <b>13</b> , <b>25-29</b> , <b>35</b> , <b>39-44</b> ).....                                                                                                                                                                                          | 16 |
| Table S10. Experimental (in DMSO- <i>d</i> <sub>6</sub> unless otherwise stated) and calculated <sup>a</sup> <sup>13</sup> C NMR shifts (ppm) for set of carbene·H <sup>+</sup> azolium salts ( <b>3</b> ·H <sup>+</sup> , <b>5</b> ·H <sup>+</sup> , <b>11</b> ·H <sup>+</sup> , <b>17</b> ·H <sup>+</sup> , <b>28</b> ·H <sup>+</sup> - <b>30</b> ·H <sup>+</sup> , <b>32</b> ·H <sup>+</sup> - <b>35</b> ·H <sup>+</sup> ). .... | 17 |
| Figure S6. Structures of [PdBr <sub>2</sub> ( <sup>i</sup> Pr <sub>2</sub> -bimy) <i>L</i> ] complexes. <i>L</i> = <b>3</b> , <b>5</b> , <b>11</b> , <b>45-56</b> .....                                                                                                                                                                                                                                                             | 18 |
| Table S11. Experimental (in CDCl <sub>3</sub> ) and calculated <sup>a</sup> <sup>13</sup> C NMR shifts (ppm) of <sup>i</sup> Pr <sub>2</sub> -bimy carbenoid resonances in <i>trans</i> - [PdBr <sub>2</sub> ( <sup>i</sup> Pr <sub>2</sub> -bimy) <i>L</i> ] complexes. ....                                                                                                                                                       | 18 |

**Table S1.** Experimental (in CDCl<sub>3</sub>) and calculated <sup>77</sup>Se NMR shifts (ppm) for main set of carbene·Se adducts (**1**·Se-**24**·Se).

| № of compound | Carbene                            | Exp. <sup>a</sup> | Calculated                                        |                                                    |                                                                 |                                                   |                                                   |                                                   |                                      |                                                   |                                                                      |                                       |                                           |                                                                           |                                                                                        |                                     |                                       |                                     |                                    |
|---------------|------------------------------------|-------------------|---------------------------------------------------|----------------------------------------------------|-----------------------------------------------------------------|---------------------------------------------------|---------------------------------------------------|---------------------------------------------------|--------------------------------------|---------------------------------------------------|----------------------------------------------------------------------|---------------------------------------|-------------------------------------------|---------------------------------------------------------------------------|----------------------------------------------------------------------------------------|-------------------------------------|---------------------------------------|-------------------------------------|------------------------------------|
|               |                                    |                   | BP86/TZPPP/BP86/TZPP<br>(PCM//PCM) <sup>a,b</sup> | PBE0/6-311G(2d,2p)//PBE0/ 6-31+G(d)<br>(vac //vac) | PBE0/6-311G(2d,2p)//PBE0/ 6-31+G(d)<br>(vac //vac) <sup>d</sup> | PBE0/6-311G(2d,2p)//PBE0/ 6-31+G(d)<br>(PCM//PCM) | PBE0/6-311G(2d,2p)//PBE0/ 6-31+G(d)<br>(PCM//vac) | PBE0/6-311G(2d,2p)//PBE0/ 6-31+G(d)<br>(vac//PCM) | PBE0/6-311G(2d,2p)//PBE0/6-311+G(2d) | PBE0/6-311G(2d,2p)//PBE0/6-311+G(2d) <sup>d</sup> | PBE0/{6-311G(2d,2p),Se(NMR-DKH)}//<br>PBE0/{6-311+G(2d),Se(NMR-DKH)} | PBE0/6-311G(3df,2p)//PBE0/6-311+G(2d) | PBE0/6-311G(3df,2p)//PBE0/6-311+G(3df,2p) | PBE0/{6-311G(3df,2p),Se(NMR-DKH)}//<br>PBE0/{6-311+G(3df,2p),Se(NMR-DKH)} | PBE0/{6-311G(3df,2p);Se(NMR-DKH)}//<br>PBE0/{6-311+G(3df,2p);Se(NMR-DKH)} <sup>d</sup> | PBE/6-311G(2d,2p)//PBE0/6-311+G(2d) | PBE50/6-311G(2d,2p)//PBE0/6-311+G(2d) | PBE0/6-311G(2d,2p)//PBE/6-311+G(2d) | PBE/6-311G(2d,2p)//PBE/6-311+G(2d) |
|               | σ(SeMe <sub>2</sub> ) <sup>b</sup> |                   |                                                   | 1790                                               |                                                                 | 1814                                              | 1815                                              | 1791                                              | 1788                                 |                                                   | 1693                                                                 | 1790                                  | 1793                                      | 1694                                                                      |                                                                                        | 1699                                | 1872                                  | 1742                                | 1647                               |
| 1             | ICy                                | -22.1             | 1617.0                                            | -74.1                                              | -39.0                                                           | -113.9                                            | -126.3                                            | -52.3                                             | -32.3                                | -27.7                                             | -42.0                                                                | -21.3                                 | -28.7                                     | -45.6                                                                     | -30.2                                                                                  | -56.7                               | -5.9                                  | -37.6                               | -71.9                              |
| 2             | IDD                                | -11.3             | 1618.5                                            | -60.3                                              | -27.5                                                           | -102.8                                            | -115.2                                            | -42.9                                             | -26.9                                | -23.0                                             | -35.5                                                                | -16.7                                 | -19.8                                     | -30.2                                                                     | -18.3                                                                                  | -50.3                               | -3.5                                  | -28.4                               | -59.3                              |
| 3             | IMes                               | 26.7              | 1535.7                                            | -0.3                                               | 22.3                                                            | -42.5                                             | -54.4                                             | 24.1                                              | 29.1                                 | 25.8                                              | 26.5                                                                 | 41.4                                  | 37.1                                      | 35.0                                                                      | 32.2                                                                                   | 10.1                                | 54.5                                  | 40.1                                | 10.1                               |
| 4             | SIDD                               | 75.0              | 1521.3                                            | 44.9                                               | 59.9                                                            | -14.8                                             | -25.4                                             | 61.7                                              | 74.2                                 | 65.1                                              | 69.2                                                                 | 80.7                                  | 79.0                                      | 73.8                                                                      | 62.3                                                                                   | 52.1                                | 94.9                                  | 72.8                                | 42.7                               |
| 5             | SIMes                              | 109.7             | 1462.6                                            | 125.0                                              | 126.4                                                           | 61.3                                              | 57.2                                              | 141.8                                             | 124.6                                | 109.0                                             | 127.0                                                                | 131.9                                 | 130.3                                     | 126.6                                                                     | 103.2                                                                                  | 97.9                                | 151.8                                 | 138.6                               | 101                                |
| 6             | I <sup>i</sup> Pr <sup>Me</sup>    | -18.2             | 1608.0                                            | -46.3                                              | -15.9                                                           | -85.8                                             | -101.8                                            | -23                                               | -22.6                                | -19.2                                             | -34.7                                                                | -11.1                                 | -13.5                                     | -29.2                                                                     | -17.5                                                                                  | -49.9                               | 6.0                                   | -24.6                               | -59.3                              |
| 7             | IMe                                | 29.9              | 1531.1                                            | 4.5                                                | 26.3                                                            | -37.3                                             | -48.7                                             | 28.4                                              | 32.5                                 | 28.8                                              | 30.6                                                                 | 44.5                                  | 40.4                                      | 28.9                                                                      | 27.5                                                                                   | 13.8                                | 57.6                                  | 43.5                                | 13.9                               |
| 8             | IPent                              | 101.2             | 1427.2                                            | 119.8                                              | 122.1                                                           | 99.3                                              | 93.5                                              | 138.4                                             | 131.9                                | 115.4                                             | 134.6                                                                | 141.2                                 | 139.2                                     | 135.4                                                                     | 110.1                                                                                  | 126.0                               | 141.6                                 | 134.7                               | 120.6                              |
| 9             | INon                               | 101.9             | 1427.5                                            | 128.6                                              | 129.4                                                           | 105.7                                             | 103.8                                             | 136.8                                             | 128.5                                | 112.4                                             | 134.4                                                                | 139.4                                 | 137.2                                     | 135.1                                                                     | 109.8                                                                                  | 122.0                               | 138.7                                 | 131.5                               | 116.8                              |
| 10            | IHept                              | 99.8              | 1435.9                                            | 124.8                                              | 126.3                                                           | 98.6                                              | 95.4                                              | 133.8                                             | 128.5                                | 112.4                                             | 134.1                                                                | 139.5                                 | 137.3                                     | 134.9                                                                     | 109.7                                                                                  | 122.3                               | 138.5                                 | 131.4                               | 117                                |
| 11            | IPr                                | 90.0              | 1441.9                                            | 90.0                                               | 97.4                                                            | 43.3                                              | 41.6                                              | 103.2                                             | 115.1                                | 100.8                                             | 130.5                                                                | 124.7                                 | 122.5                                     | 133.4                                                                     | 108.5                                                                                  | 112.9                               | 123.5                                 | 119.6                               | 109.1                              |
| 12            | IPr <sup>OMe</sup>                 | 86.5              | 1443.6                                            | 88.4                                               | 96.0                                                            | 37.5                                              | 34                                                | 102.6                                             | 116.5                                | 102.0                                             | 131.2                                                                | 125.8                                 | 123.7                                     | 133.9                                                                     | 108.9                                                                                  | 113.1                               | 125.4                                 | 121.3                               | 109.7                              |
| 13            | SIPr                               | 190.0             | 1347.2                                            | 209.0                                              | 196.2                                                           | 152.9                                             | 153                                               | 215.6                                             | 228.5                                | 199.6                                             | 244.2                                                                | 231.8                                 | 229.7                                     | 245.5                                                                     | 195.4                                                                                  | 217.2                               | 235.9                                 | 231.4                               | 214.5                              |

|    |                     |       |                                |       |       |       |       |       |       |       |       |       |       |       |       |       |       |       |       |
|----|---------------------|-------|--------------------------------|-------|-------|-------|-------|-------|-------|-------|-------|-------|-------|-------|-------|-------|-------|-------|-------|
| 14 | SIPr <sup>OMe</sup> | 184.6 | 1349.5                         | 194.2 | 183.9 | 144.7 | 136.8 | 205.2 | 220.4 | 192.5 | 236.7 | 225.7 | 224.1 | 238.0 | 189.6 | 210.3 | 231.1 | 224.5 | 206.4 |
| 15 | IPr*                | 106.0 | 1442.9                         | 89.7  | 97.1  | 85.8  | 82.1  | 100.6 | 107.2 | 93.9  | 120.6 | 118.6 | 116.5 | 124.6 | 101.7 | 112.5 | 111.3 | 107.8 | 105.1 |
| 16 | IPr* <sup>OMe</sup> | 104.0 | 1439.1                         | 93.5  | 100.3 | 90.3  | 86    | 104.8 | 112.4 | 98.4  | 124.2 | 124.4 | 122.1 | 128.4 | 104.6 | 117.7 | 116.3 | 113.6 | 110.7 |
| 17 | IPr <sup>Cl</sup>   | 173.6 | 1347.4                         | 177.0 | 169.7 | 146.3 | 139.5 | 188.8 | 199.9 | 174.7 | 214.3 | 207.9 | 205.8 | 218.0 | 174.1 | 204.7 | 198.9 | 203.4 | 202.5 |
| 18 | I'Bu                | 182.6 | 1354.9                         | 167.0 | 161.3 | 133.4 | 120.4 | 173.4 | 189.3 | 165.4 | 202.0 | 195.9 | 195.0 | 214.2 | 171.1 | 170.1 | 196.8 | 193   | 172.2 |
| 19 | IAd                 | 196.9 | 1360.6                         | 176.4 | 169.2 | 146.9 | 136.3 | 180.9 | 192.3 | 168.0 | 207.7 | 201.6 | 199.9 | 217.3 | 173.5 | 178.9 | 204.8 | 202   | 182.3 |
| 20 | Tr1                 | 33.5  | 1498.3                         | 17.8  | 37.4  | -33.1 | -46.2 | 32.6  | 41.8  | 36.9  | 37.6  | 47.7  | 44.1  | 37.1  | 33.9  | 21.6  | 59.7  | 52.7  | 25.2  |
| 21 | Tr2                 | 76.1  | 1441.8                         | 78.7  | 88.0  | 21.7  | 8.3   | 92.8  | 99.4  | 87.1  | 91.4  | 102.8 | 99.5  | 90.5  | 75.3  | 79.4  | 115.1 | 115.2 | 88.9  |
| 22 | Tr3                 | 73.6  | 1473.5                         | 73.3  | 83.5  | 16.5  | 4     | 86.2  | 92.3  | 80.9  | 86.9  | 95.9  | 93.6  | 88.0  | 73.3  | 80.0  | 101.8 | 96.3  | 76.9  |
| 23 | Tr4                 | 46.9  | 1508.4                         | 12.9  | 33.3  | -13.9 | -24.2 | 24.5  | 33.1  | 29.3  | 33.3  | 39.5  | 35.6  | 33.8  | 31.3  | 7.4   | 54.2  | 40.5  | 7.7   |
| 24 | Tr5                 | 131.2 | 1304.5                         | 122.6 | -39.0 | 72.6  | 77.6  | 121.6 | 159.3 | -27.7 | 165.7 | 165.6 | 168.6 | 171.8 | -30.2 | 152.2 | 168.4 | 184.7 | 171.1 |
|    | R <sup>2</sup>      |       | 0.887<br>(0.938 <sup>c</sup> ) | 0.951 | 0.951 | 0.923 | 0.913 | 0.940 | 0.969 | 0.969 | 0.969 | 0.969 | 0.968 | 0.975 | 0.975 | 0.949 | 0.967 | 0.958 | 0.948 |
|    | RMSE                |       |                                |       | 14.7  |       |       |       |       | 11.5  |       |       |       |       | 10.3  |       |       |       |       |

<sup>a</sup> data from the ref. [20]; <sup>b</sup> shielding; <sup>c</sup> evaluated without Tr5; <sup>d</sup> scaled.

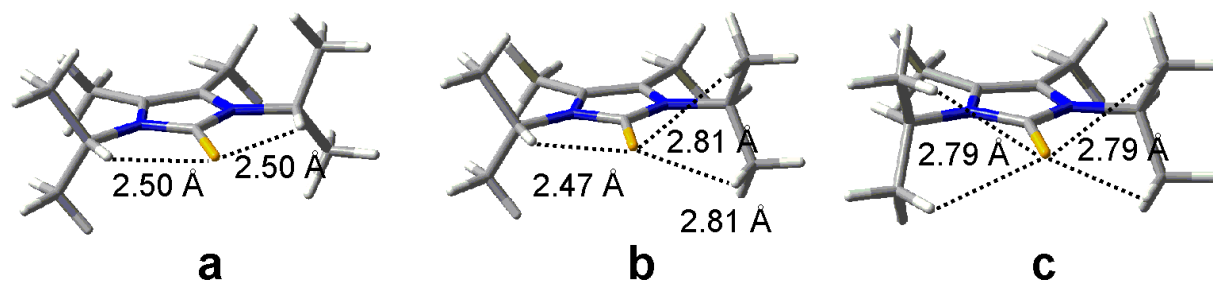

**Figure S1.** Different forms of  $\text{IPr}^{\text{Me}}\cdot\text{Se}$  ( $6\cdot\text{Se}$ ) with corresponding distances (Å) between  $i\text{Pr}$  hydrogen's and Se.

**Table S2.**  $^{77}\text{Se}$  NMR shifts (ppm) for **ICy** (1 Se), **IDD** (2 Se) and  **$\text{IPr}^{\text{Me}}$**  (6 Se) Se-adducts. Experimental (in  $\text{CDCl}_3$ ) and calculated<sup>a</sup> CSs for different forms with corresponding energies (in parenthesis).

| № of compound | Carbene                                    | Exp.  | Calculated NMR shifts (Energy), ppm (kcal/mol) |                       |                       |
|---------------|--------------------------------------------|-------|------------------------------------------------|-----------------------|-----------------------|
|               |                                            |       | <b>a</b> <sup>b</sup>                          | <b>b</b> <sup>b</sup> | <b>c</b> <sup>b</sup> |
| <b>1</b>      | <b>ICy</b>                                 | -22.1 | -39.0 (0.0)                                    | 40.4 (1.5)            | 99.2 (4.2)            |
| <b>2</b>      | <b>IDD</b>                                 | -11.3 | -27.5 (0.0)                                    | 30.9 (1.6)            | 80.2 (3.9)            |
| <b>6</b>      | <b><math>\text{IPr}^{\text{Me}}</math></b> | -18.2 | -15.9 (0.0)                                    | 46.5 (0.3)            | 109.8 (1.5)           |

<sup>a</sup> at PBE0/6-311G(2d,2p)//PBE0/6-31+G(d) level and scaled; <sup>b</sup> structure of isomers as on Figure S1.

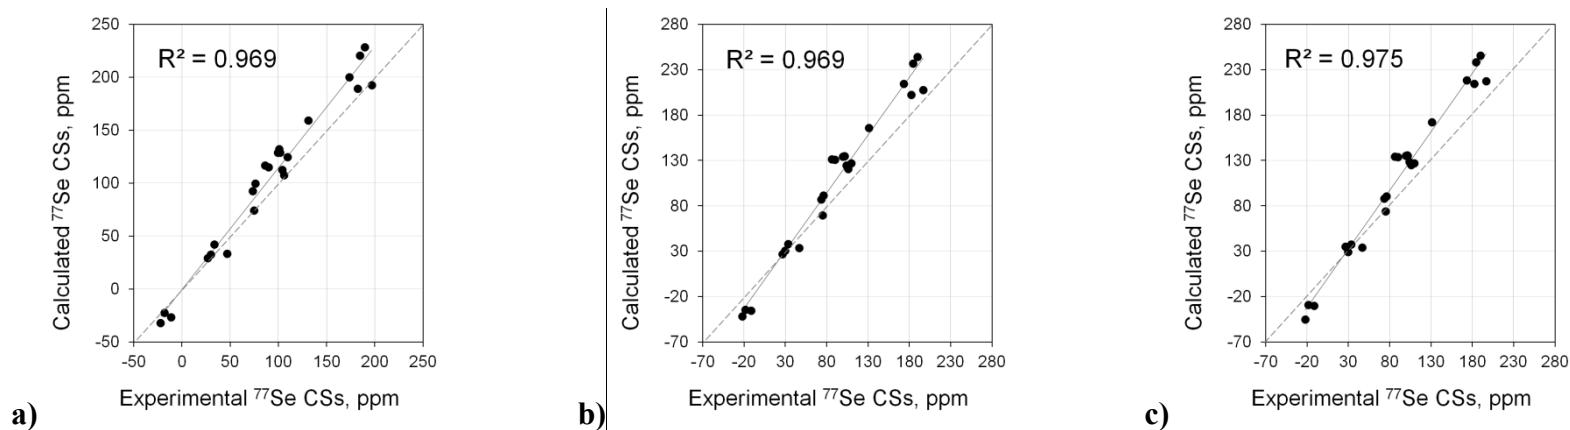

**Figure S2.** Correlation of calculated vs. experimental  $^{77}\text{Se}$  NMR shifts for the main set of carbene Se adducts (**1**·Se - **24**·Se) (a - PBE0/6-311G(2d,2p)//PBE0/6-311+G(2d) level, b - PBE0/{6-311G(2d,2p);Se(NMR-DKH)}/PBE0/{6-311+G(2d);Se(NMR-DKH)}, c - PBE0/{6-311G(3df,2p);Se(NMR-DKH)}/PBE0/{6-311+G(3df,2p);Se(NMR-DKH)} level).

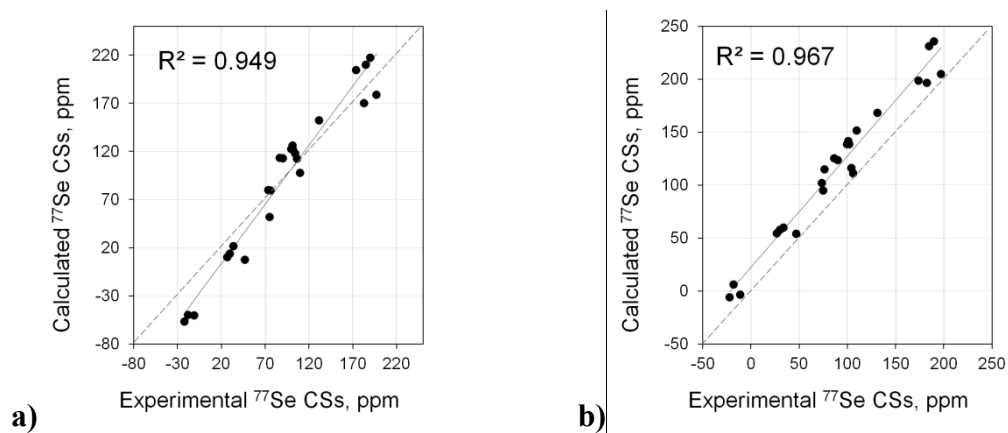

**Figure S3.** Correlation of calculated vs. experimental  $^{77}\text{Se}$  NMR shifts for the main set of carbene Se adducts (**1**·Se - **24**·Se) (a - PBE/6-311G(2d,2p)//PBE0/6-311+G(2d) level, b - PBE50/6-311G(2d,2p)//PBE0/6-311+G(2d) level).

**Table S3.** Se-C bond lengths (L, Å) and some valence angles (°) for 1•Se, 5•Se, 7•Se, 13•Se, and 18•Se calculated at DFT level of theory (PBE0) with different basis sets.

| Carbene                             | Basis sets                   | L (Se-C <sup>Carbene</sup> ) | ∠N-C <sup>Carbene</sup> -Se | ∠N-C <sup>Carbene</sup> -N |
|-------------------------------------|------------------------------|------------------------------|-----------------------------|----------------------------|
| <b>1</b><br><b>ICy</b>              | 6-31+G(d)                    | <i>1.811</i>                 | <i>127.31</i>               | <i>105.38</i>              |
|                                     | 6-311+G(2d)                  | 1.835                        | 127.26                      | 105.47                     |
|                                     | 6-311+G(3df,2p)              | 1.832                        | 127.30                      | 105.39                     |
|                                     | 6-311+G(2d) Se - NMR_DKH     | 1.834                        | 127.28                      | 105.44                     |
|                                     | 6-311+G(3df,2p) Se - NMR_DKH | 1.833                        | 127.32                      | 105.35                     |
| <b>5</b><br><b>SIMes</b>            | 6-31+G(d)                    | <i>1.795</i>                 | <i>125.82</i>               | <i>108.37</i>              |
|                                     | 6-311+G(2d)                  | 1.818                        | 125.73                      | 108.53                     |
|                                     | 6-311+G(3df,2p)              | 1.816                        | 125.76                      | 108.49                     |
|                                     | 6-311+G(2d) Se - NMR_DKH     | 1.817                        | 125.76                      | 108.48                     |
|                                     | 6-311+G(3df,2p) Se - NMR_DKH | 1.816                        | 125.76                      | 108.48                     |
| <b>7</b><br><b>IMe</b>              | 6-31+G(d)                    | <i>1.800</i>                 | <i>127.50</i>               | <i>104.99</i>              |
|                                     | 6-311+G(2d)                  | 1.821                        | 127.57                      | 104.87                     |
|                                     | 6-311+G(3df,2p)              | 1.818                        | 127.58                      | 104.84                     |
|                                     | 6-311+G(2d) Se - NMR_DKH     | 1.820                        | 127.59                      | 104.82                     |
|                                     | 6-311+G(3df,2p) Se - NMR_DKH | 1.819                        | 127.58                      | 104.83                     |
| <b>13</b><br><b>SIPr</b>            | 6-31+G(d)                    | <i>1.796</i>                 | <i>126.37</i>               | <i>108.23</i>              |
|                                     | 6-311+G(2d)                  | 1.817                        | 125.81                      | 108.38                     |
|                                     | 6-311+G(3df,2p)              | 1.815                        | 125.83                      | 108.35                     |
|                                     | 6-311+G(2d) Se - NMR_DKH     | 1.816                        | 125.83                      | 108.34                     |
|                                     | 6-311+G(3df,2p) Se - NMR_DKH | 1.815                        | 125.83                      | 108.35                     |
| <b>18</b><br><b>I<sup>t</sup>Bu</b> | 6-31+G(d)                    | <i>1.827</i>                 | <i>127.09</i>               | <i>105.82</i>              |
|                                     | 6-311+G(2d)                  | 1.847                        | 127.13                      | 105.74                     |
|                                     | 6-311+G(3df,2p)              | 1.844                        | 127.14                      | 105.72                     |
|                                     | 6-311+G(2d) Se - NMR_DKH     | 1.845                        | 127.14                      | 105.70                     |
|                                     | 6-311+G(3df,2p) Se - NMR_DKH | 1.845                        | 127.14                      | 105.72                     |

**Table S4.** Experimental (in CDCl<sub>3</sub>) and calculated at non-relativistic and fully relativistic mDKS levels of theory <sup>77</sup>Se NMR shifts (ppm) for selected carbene·Se adducts (**1**·Se -**2**·Se, **4**·Se -**7**·Se, **13**·Se -**14**·Se, **17**·Se -**20**·Se).

| № of compound | Carbene                             | Exp.  | Calculated                               |                                                                                   |                                             |                                                 |                                                                   |
|---------------|-------------------------------------|-------|------------------------------------------|-----------------------------------------------------------------------------------|---------------------------------------------|-------------------------------------------------|-------------------------------------------------------------------|
|               |                                     |       | non-relativistic                         |                                                                                   | relativistic                                |                                                 |                                                                   |
|               |                                     |       | PBE0/6-311G(2d,2p)//<br>PBE0/6-311+G(2d) | PBE0/{6-311G(3df,2p);<br>Se(NMR-DKH)}//<br>PBE0/{6-311+G(3df,2p);<br>Se(NMR-DKH)} | "TZ_DZ" <sup>b</sup> //<br>PBE0/6-311+G(2d) | "DTZ_TZ_DZ" <sup>b</sup> //<br>PBE0/6-311+G(2d) | "TZ_DZ" <sup>b</sup> //<br>PBE0/{6-311+G(3df,2p);<br>Se(NMR-DKH)} |
|               | σ(SeMe <sub>2</sub> ) <sup>a</sup>  |       | 1788                                     | 1694                                                                              | 2066                                        | 2034                                            | 2070                                                              |
| <b>1</b>      | <b>ICy</b>                          | -22.1 | -32.3                                    | -45.6                                                                             | -5.4                                        | -40.5                                           | -11.4                                                             |
| <b>2</b>      | <b>IDD</b>                          | -11.3 | -26.9                                    | -30.2                                                                             | -3.9                                        | -36.9                                           | -3.6                                                              |
| <b>4</b>      | <b>SIDD</b>                         | 75.0  | 74.2                                     | 73.8                                                                              | 102.3                                       |                                                 |                                                                   |
| <b>5</b>      | <b>SIMes</b>                        | 109.7 | 124.6                                    | 126.6                                                                             | 158.9                                       | 124.4                                           |                                                                   |
| <b>6</b>      | <b>I<sup>i</sup>Pr<sup>Me</sup></b> | -18.2 | -22.6                                    | -29.2                                                                             | 4.4                                         | -30.0                                           | 4.5                                                               |
| <b>7</b>      | <b>IMe</b>                          | 29.9  | 32.5                                     | 28.9                                                                              | 65.1                                        |                                                 |                                                                   |
| <b>13</b>     | <b>SIPr</b>                         | 190.0 | 228.5                                    | 245.5                                                                             | 250.7                                       | 233.1                                           | 250.4                                                             |
| <b>14</b>     | <b>SIPr<sup>OMe</sup></b>           | 184.6 | 220.4                                    | 238.0                                                                             | 244.4                                       | 227.6                                           | 244.1                                                             |
| <b>17</b>     | <b>IPr<sup>Cl</sup></b>             | 173.6 | 199.9                                    | 218.0                                                                             | 218.3                                       | 202.2                                           | 215.9                                                             |
| <b>18</b>     | <b>I<sup>i</sup>Bu</b>              | 182.6 | 189.3                                    | 214.2                                                                             | 215.4                                       | 191.7                                           | 215.8                                                             |
| <b>19</b>     | <b>IAd</b>                          | 196.9 | 192.3                                    | 217.3                                                                             | 226.4                                       | 199.3                                           | 208.8                                                             |
| <b>20</b>     | <b>Tr1</b>                          | 33.5  | 41.8                                     | 37.1                                                                              | 75.9                                        |                                                 |                                                                   |

<sup>a</sup> shielding; <sup>b</sup> "TZ\_DZ" - 4c-mDKS: PBE0/{ucc-pvtz+ucc-pvdz, Se(dyall-v<sup>dz</sup>)}, "DTZ\_TZ\_DZ" - 4c-mDKS: PBE0/{ucc-pvtz+ucc-pvdz, Se(dyall-v<sup>tz</sup>)}.



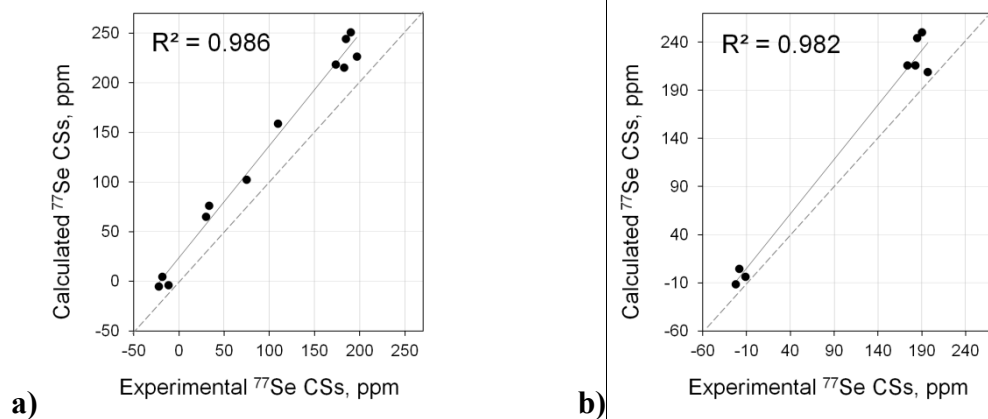

**Figure S4.** Correlation of calculated vs. experimental  $^{77}\text{Se}$  NMR shifts for the main set of carbene Se adducts (a - **1·Se -2·Se**, **4·Se -7·Se**, **13·Se -14·Se**, **17·Se -20·Se**, TZ\_DZ//PBE0/6-311+G(2d) level, b - **1·Se -2·Se**, **6·Se**, **13·Se -14·Se**, **17·Se -19·Se**, TZ\_DZ//PBE0/{6-311+G(3df,2p);Se(NMR-DKH)} level).

**Table S5.** Experimental (in  $\text{CDCl}_3$ ) and calculated<sup>a</sup>  $^{77}\text{Se}$  NMR shifts (ppm) for some carbene·Se adducts (**13·Se-14·Se**, **17·Se**) and their associates with chloroform.

| № of compound | Carbene                   | Exp.  | Calc.  |                         |
|---------------|---------------------------|-------|--------|-------------------------|
|               |                           |       | NHC-Se | NHC-Se* $\text{CHCl}_3$ |
| <b>13</b>     | <b>SIPr</b>               | 190.0 | 199.6  | 178.4                   |
| <b>14</b>     | <b>SIPr<sup>OMe</sup></b> | 184.6 | 192.5  | 172.7                   |
| <b>17</b>     | <b>IPr<sup>Cl</sup></b>   | 173.6 | 174.7  | 161.1                   |

<sup>a</sup> at PBE0/6-311G(2d,2p)//PBE0/6-311+G(2d) level and scaled;

**Table S6.** Experimental (in CDCl<sub>3</sub> unless otherwise stated) and calculated <sup>77</sup>Se NMR shifts (ppm) for extended set of carbene·Se adducts (**1·Se** - **38·Se**).

| № of compound | Carbene                             | Exp. <sup>a</sup> | Calculated                             |                                                     |                                          |                                                       |                                                                                   |                                                                                                |
|---------------|-------------------------------------|-------------------|----------------------------------------|-----------------------------------------------------|------------------------------------------|-------------------------------------------------------|-----------------------------------------------------------------------------------|------------------------------------------------------------------------------------------------|
|               |                                     |                   | PBE0/6-311G(2d,2p)//<br>PBE0/6-31+G(d) | PBE0/6-311G(2d,2p)//<br>PBE0/6-31+G(d) <sup>b</sup> | PBE0/6-311G(2d,2p)//<br>PBE0/6-311+G(2d) | PBE0/6-311G(2d,2p)//<br>PBE0/6-311+G(2d) <sup>b</sup> | PBE0/{6-311G(3df,2p);<br>Se(NMR-DKH)}//<br>PBE0/{6-311+G(3df,2p);<br>Se(NMR-DKH)} | PBE0/{6-311G(3df,2p);<br>Se(NMR-DKH)}//<br>PBE0/{6-311+G(3df,2p);<br>Se(NMR-DKH)} <sup>b</sup> |
| <b>1</b>      | <b>ICy</b>                          | -22.1             | -74.1                                  | -48.8                                               | -32.3                                    | -33.7                                                 | -45.6                                                                             | -42.6                                                                                          |
| <b>2</b>      | <b>IDD</b>                          | -11.3             | -60.3                                  | -36.5                                               | -26.9                                    | -28.7                                                 | -30.2                                                                             | -29.2                                                                                          |
| <b>3</b>      | <b>IMes</b>                         | 26.7              | -0.3                                   | 17.2                                                | 29.1                                     | 22.4                                                  | 35.0                                                                              | 27.2                                                                                           |
| <b>4</b>      | <b>SIDD</b>                         | 75.0              | 44.9                                   | 57.7                                                | 74.2                                     | 63.5                                                  | 73.8                                                                              | 60.9                                                                                           |
| <b>5</b>      | <b>SIMes</b>                        | 109.7             | 125.0                                  | 129.3                                               | 124.6                                    | 109.5                                                 | 126.6                                                                             | 106.6                                                                                          |
| <b>6</b>      | <b>I<sup>i</sup>Pr<sup>Me</sup></b> | -18.2             | -46.3                                  | -24.0                                               | -22.6                                    | -24.8                                                 | -29.2                                                                             | -28.4                                                                                          |
| <b>7</b>      | <b>IMe</b>                          | 29.9              | 4.5                                    | 21.5                                                | 32.5                                     | 25.5                                                  | 28.9                                                                              | 22.0                                                                                           |
| <b>8</b>      | <b>IPent</b>                        | 101.2             | 119.8                                  | 124.7                                               | 131.9                                    | 116.2                                                 | 135.4                                                                             | 114.2                                                                                          |
| <b>9</b>      | <b>INon</b>                         | 101.9             | 128.6                                  | 132.6                                               | 128.5                                    | 113.1                                                 | 135.1                                                                             | 114.0                                                                                          |
| <b>10</b>     | <b>IHept</b>                        | 99.8              | 124.8                                  | 129.2                                               | 128.5                                    | 113.1                                                 | 134.9                                                                             | 113.8                                                                                          |
| <b>11</b>     | <b>IPr</b>                          | 90.0              | 90.0                                   | 98.0                                                | 115.1                                    | 100.8                                                 | 133.4                                                                             | 112.5                                                                                          |
| <b>12</b>     | <b>IPr<sup>OMe</sup></b>            | 86.5              | 88.4                                   | 96.6                                                | 116.5                                    | 102.1                                                 | 133.9                                                                             | 112.9                                                                                          |
| <b>13</b>     | <b>SIPr</b>                         | 190.0             | 209.0                                  | 204.5                                               | 228.5                                    | 204.3                                                 | 245.5                                                                             | 209.6                                                                                          |
| <b>14</b>     | <b>SIPr<sup>OMe</sup></b>           | 184.6             | 194.2                                  | 191.3                                               | 220.4                                    | 196.9                                                 | 238.0                                                                             | 203.1                                                                                          |
| <b>15</b>     | <b>IPr*</b>                         | 106.0             | 89.7                                   | 97.8                                                | 107.2                                    | 93.6                                                  | 124.6                                                                             | 104.9                                                                                          |
| <b>16</b>     | <b>IPr*<sup>OMe</sup></b>           | 104.0             | 93.5                                   | 101.2                                               | 112.4                                    | 98.4                                                  | 128.4                                                                             | 108.2                                                                                          |
| <b>17</b>     | <b>IPr<sup>Cl</sup></b>             | 173.6             | 177.0                                  | 175.9                                               | 199.9                                    | 178.2                                                 | 218.0                                                                             | 185.8                                                                                          |
| <b>18</b>     | <b>I<sup>t</sup>Bu</b>              | 182.6             | 167.0                                  | 166.9                                               | 189.3                                    | 168.5                                                 | 214.2                                                                             | 182.5                                                                                          |

|                      |                                |                     |        |        |        |        |        |        |
|----------------------|--------------------------------|---------------------|--------|--------|--------|--------|--------|--------|
| 19                   | IAd                            | 196.9               | 176.4  | 175.3  | 192.3  | 171.3  | 217.3  | 185.2  |
| 20                   | Tr1                            | 33.5                | 17.8   | 33.4   | 41.8   | 33.9   | 37.1   | 29.1   |
| 21                   | Tr2                            | 76.1                | 78.7   | 87.9   | 99.4   | 86.5   | 90.5   | 75.3   |
| 22                   | Tr3                            | 73.6                | 73.3   | 83.1   | 92.3   | 80.0   | 88.0   | 73.2   |
| 23                   | Tr4                            | 46.9                | 12.9   | 29.0   | 33.1   | 26.0   | 33.8   | 26.2   |
| 24                   | Tr5                            | 131.2               | 122.6  | 127.2  | 159.3  | 141.2  | 171.8  | 145.8  |
| 25                   |                                | 593.0 <sup>c</sup>  | 646.9  | 596.4  | 649.0  | 588.0  | 678.2  | 584.5  |
| 26                   | ITME                           | 3.0 <sup>c</sup>    | -46.4  | -24.0  | -17.1  | -19.8  | -22.0  | -22.1  |
| 27                   | <i>i</i> Pr                    | -3.0 <sup>c</sup>   | -56.4  | -33.0  | -22.4  | -24.6  | -42.0  | -39.5  |
| 28                   | ThIPr                          | 396.0 <sup>c</sup>  | 513.0  | 476.6  | 504.1  | 455.8  | 531.1  | 457.0  |
| 29                   | BI <sup>i</sup> Pr             | 67.0 <sup>c</sup>   | 56.8   | 68.3   | 76.9   | 66.0   | 74.8   | 61.7   |
| 30                   | AAC1                           | 437.0 <sup>c</sup>  | 525.5  | 487.8  | 546.7  | 494.6  | 573.7  | 493.9  |
| 31                   |                                | 183.0 <sup>c</sup>  | 207.9  | 203.5  | 222.1  | 198.5  | 232.3  | 198.2  |
| 32 (C <sub>a</sub> ) |                                | 516.0               | 542.9  | 503.3  | 564.4  | 510.8  | 585.2  | 503.9  |
| 32 (C <sub>b</sub> ) |                                | 113.0               | 127.9  | 131.9  | 150.9  | 133.5  | 155.1  | 131.3  |
| 33                   | 6-Mes                          | 271.0 <sup>c</sup>  | 280.0  | 268.1  | 292.9  | 263.1  | 291.8  | 249.7  |
| 34                   | Trazy                          | 196.0 <sup>c</sup>  | 167.1  | 167.0  | 206.5  | 184.2  | 213.6  | 182.0  |
| 35                   | CAC-Mes                        | 472.0 <sup>c</sup>  | 522.2  | 484.8  | 532.3  | 481.5  | 553.5  | 476.4  |
| 36                   | 6-CAAC                         | 1180.0 <sup>c</sup> | 1288.5 | 1170.6 | 1288.6 | 1171.5 | 1360.8 | 1175.8 |
| 37                   | DAC1a                          | 847.0 <sup>c</sup>  | 874.8  | 800.4  | 894.3  | 811.8  | 934.3  | 806.3  |
| 38                   | <i>i</i> Pr <sub>2</sub> -pery | 364.0 <sup>c</sup>  | 349.9  | 330.6  | 366.8  | 330.5  | 386.5  | 331.8  |
|                      | <i>R</i> <sup>2</sup>          |                     | 0.991  | 0.991  | 0.994  | 0.994  | 0.993  | 0.993  |
|                      | RMSE                           |                     |        | 23.8   |        | 19.3   |        | 21.0   |

<sup>a</sup> data from the ref. [11,18, 20]; <sup>b</sup>scaled; <sup>c</sup>in acetone-*d*<sub>6</sub>.

**Table S7.** Experimental (in C<sub>6</sub>D<sub>6</sub> unless otherwise stated) and calculated <sup>31</sup>P NMR shifts (ppm) for main set of carbene-PPh adducts (**3**·PPh, **5**·PPh, **11**·PPh, **13**·PPh, **26**·PPh-**29**·PPh, **35**·PPh, **39**·PPh-**40**·PPh).

| № of compound | Carbene                 | Exp. <sup>a</sup>  | Calculated                              |                                        |                                                     |                                          |                                                       |                                           |                                                        |
|---------------|-------------------------|--------------------|-----------------------------------------|----------------------------------------|-----------------------------------------------------|------------------------------------------|-------------------------------------------------------|-------------------------------------------|--------------------------------------------------------|
|               |                         |                    | BP86/TZPP//<br>BP86/TZPP <sup>a,b</sup> | PBE0/6-311G(2d,2p)//<br>PBE0/6-31+G(d) | PBE0/6-311G(2d,2p)//<br>PBE0/6-31+G(d) <sup>c</sup> | PBE0/6-311G(2d,2p)//<br>PBE0/6-311+G(2d) | PBE0/6-311G(2d,2p)//<br>PBE0/6-311+G(2d) <sup>c</sup> | PBE0/6-311G(3df,2p)//<br>PBE0/6-311+G(2d) | PBE0/6-311G(3df,2p)//<br>PBE0/6-311+G(2d) <sup>c</sup> |
| <b>3</b>      | <b>IMes</b>             | -23.0              | 402.1                                   | -35.0                                  | -25.6                                               | -28.9                                    | -26.1                                                 | -30.4                                     | -26.2                                                  |
| <b>5</b>      | <b>SIMes</b>            | -10.4              | 387.3                                   | -18.1                                  | -9.6                                                | -12.4                                    | -10.4                                                 | -14.4                                     | -11.2                                                  |
| <b>11</b>     | <b>IPr</b>              | -18.9              | 389.6                                   | -27.1                                  | -18.1                                               | -20.1                                    | -17.7                                                 | -21.5                                     | -17.9                                                  |
| <b>13</b>     | <b>SIPr</b>             | -10.2 <sup>d</sup> | 383.1                                   | -15.4                                  | -7.0                                                | -8.6                                     | -6.7                                                  | -10.7                                     | -7.7                                                   |
| <b>26</b>     | <b>ITME</b>             | -53.5 <sup>e</sup> | 424.0                                   | -64.7                                  | -53.8                                               | -56.9                                    | -52.7                                                 | -58.8                                     | -52.9                                                  |
| <b>27</b>     | <b>I<sup>i</sup>Pr</b>  | -61.2              | 430.2                                   | -73.1                                  | -61.8                                               | -67.0                                    | -62.4                                                 | -68.6                                     | -62.1                                                  |
| <b>28</b>     | <b>ThIPr</b>            | 57.0               | 335.3                                   | 52.4                                   | 57.3                                                | 59.0                                     | 57.6                                                  | 59.6                                      | 58.2                                                   |
| <b>29</b>     | <b>BI<sup>i</sup>Pr</b> | -34.6              | 408.2                                   | -44.8                                  | -34.9                                               | -37.8                                    | -34.6                                                 | -39.4                                     | -34.7                                                  |
| <b>35</b>     | <b>CAC-Mes</b>          | 39.7               | 337.1                                   | 32.0                                   | 37.9                                                | 39.0                                     | 38.6                                                  | 37.1                                      | 37.1                                                   |
| <b>39</b>     | <b>CAAC-IPr</b>         | 68.9               | 321.5                                   | 64.2                                   | 68.5                                                | 70.4                                     | 68.5                                                  | 69.8                                      | 67.8                                                   |
| <b>40</b>     | <b>6-IPr</b>            | 14.8               | 359.7                                   | 8.7                                    | 15.8                                                | 13.7                                     | 14.5                                                  | 16.9                                      | 18.2                                                   |
|               | <i>R</i> <sup>2</sup>   |                    | 0.987                                   | 0.999                                  | 0.999                                               | 0.999                                    | 0.999                                                 | 0.998                                     | 0.998                                                  |
|               |                         |                    |                                         |                                        | 1.5                                                 |                                          | 1.6                                                   |                                           | 1.9                                                    |

<sup>a</sup> data from the ref. [20]; <sup>b</sup> shielding; <sup>c</sup> scaled; <sup>d</sup> in CDCl<sub>3</sub>; <sup>e</sup> in THF-*d*<sub>8</sub>

**Table S8.** Experimental (in C<sub>6</sub>D<sub>6</sub> unless otherwise stated) and calculated <sup>31</sup>P and <sup>13</sup>C NMR shifts (ppm) for extended set of carbene-PPh adducts (**3**·PPh, **5**·PPh, **11**·PPh, **13**·PPh, **25**·PPh-**29**·PPh, **35**·PPh, **37**·PPh, **39**·PPh-**44**·PPh).

| № of compound | Carbene                       | $\delta(^{31}\text{P})$ |                                         |                                                      |                                          |                                                       |                                           |                                                        | $\delta(^{13}\text{C})$ |                                         |                                                      |                                          |                                                       |                                           |                                                        |
|---------------|-------------------------------|-------------------------|-----------------------------------------|------------------------------------------------------|------------------------------------------|-------------------------------------------------------|-------------------------------------------|--------------------------------------------------------|-------------------------|-----------------------------------------|------------------------------------------------------|------------------------------------------|-------------------------------------------------------|-------------------------------------------|--------------------------------------------------------|
|               |                               | Exp. <sup>a</sup>       | Calculated                              |                                                      |                                          |                                                       |                                           |                                                        | Exp. <sup>a</sup>       | Calculated                              |                                                      |                                          |                                                       |                                           |                                                        |
|               |                               |                         | PBE0/6-311G(2d,2p)//<br>PBE0/6-311+G(d) | PBE0/6-311G(2d,2p)//<br>PBE0/6-311+G(d) <sup>b</sup> | PBE0/6-311G(2d,2p)//<br>PBE0/6-311+G(2d) | PBE0/6-311G(2d,2p)//<br>PBE0/6-311+G(2d) <sup>b</sup> | PBE0/6-311G(3df,2p)//<br>PBE0/6-311+G(2d) | PBE0/6-311G(3df,2p)//<br>PBE0/6-311+G(2d) <sup>b</sup> |                         | PBE0/6-311G(2d,2p)//<br>PBE0/6-311+G(d) | PBE0/6-311G(2d,2p)//<br>PBE0/6-311+G(d) <sup>b</sup> | PBE0/6-311G(2d,2p)//<br>PBE0/6-311+G(2d) | PBE0/6-311G(2d,2p)//<br>PBE0/6-311+G(2d) <sup>b</sup> | PBE0/6-311G(3df,2p)//<br>PBE0/6-311+G(2d) | PBE0/6-311G(3df,2p)//<br>PBE0/6-311+G(2d) <sup>b</sup> |
| <b>3</b>      | <b>IMes</b>                   | -23.0                   | -35.0                                   | -24.4                                                | -28.9                                    | -24.9                                                 | -30.4                                     | -25.1                                                  | 170.0 <sup>d</sup>      | 170.2                                   | 165.8                                                | 169.8                                    | 165.9                                                 | 172.0                                     | 166.0                                                  |
| <b>5</b>      | <b>SIMes</b>                  | -10.4                   | -18.1                                   | -9.1                                                 | -12.4                                    | -9.9                                                  | -14.4                                     | -10.5                                                  | 184.3 <sup>d</sup>      | 186.9                                   | 180.5                                                | 186.3                                    | 180.7                                                 | 188.3                                     | 180.7                                                  |
| <b>11</b>     | <b>IPr</b>                    | -18.9                   | -27.1                                   | -17.2                                                | -20.1                                    | -16.9                                                 | -21.5                                     | -17.0                                                  | 172.9                   | 175.8                                   | 170.7                                                | 175.3                                    | 170.8                                                 | 177.4                                     | 170.9                                                  |
| <b>13</b>     | <b>SIPr</b>                   | -10.2 <sup>c</sup>      | -15.4                                   | -6.7                                                 | -8.6                                     | -6.4                                                  | -10.7                                     | -7.2                                                   | 186.9 <sup>c</sup>      | 193.9                                   | 186.7                                                | 192.7                                    | 186.5                                                 | 194.6                                     | 186.4                                                  |
| <b>25</b>     |                               | 69.5                    | 65.7                                    | 66.4                                                 | 72.2                                     | 67.5                                                  | 71.3                                      | 67.4                                                   | 199.7                   | 207.0                                   | 198.3                                                | 206.4                                    | 198.8                                                 | 208.3                                     | 198.7                                                  |
| <b>26</b>     | <b>ITME</b>                   | -53.5 <sup>d</sup>      | -64.7                                   | -51.1                                                | -56.9                                    | -50.6                                                 | -58.8                                     | -50.9                                                  | 169.1 <sup>d</sup>      | 174.9                                   | 169.9                                                | 174.6                                    | 170.2                                                 | 177.0                                     | 170.5                                                  |
| <b>27</b>     | <b>I<sup>i</sup>Pr</b>        | -61.2                   | -73.1                                   | -58.7                                                | -67.0                                    | -59.8                                                 | -68.6                                     | -59.8                                                  | 167.8                   | 174.4                                   | 169.5                                                | 173.8                                    | 169.5                                                 | 176.5                                     | 170.1                                                  |
| <b>28</b>     | <b>ThIPr</b>                  | 57.0                    | 52.4                                    | 54.4                                                 | 59.0                                     | 55.5                                                  | 59.6                                      | 56.7                                                   | 192.0                   | 204.0                                   | 195.7                                                | 203.5                                    | 196.2                                                 | 204.7                                     | 195.4                                                  |
| <b>29</b>     | <b>BI<sup>i</sup>Pr</b>       | -34.6                   | -44.8                                   | -33.2                                                | -37.8                                    | -33.1                                                 | -39.4                                     | -33.3                                                  | 177.4                   | 181.6                                   | 175.9                                                | 181.2                                    | 176.1                                                 | 183.6                                     | 176.5                                                  |
| <b>35</b>     | <b>CAC-Mes</b>                | 39.7                    | 32.0                                    | 36.0                                                 | 39.0                                     | 37.2                                                  | 37.1                                      | 36.3                                                   | 180.3                   | 186.6                                   | 180.3                                                | 184.8                                    | 179.4                                                 | 186.6                                     | 179.2                                                  |
| <b>37</b>     | <b>DAC1a</b>                  | 83.0                    | 75.4                                    | 75.1                                                 | 81.1                                     | 75.7                                                  | 80.0                                      | 75.3                                                   | 172.0                   | 182.4                                   | 176.6                                                | 181.5                                    | 176.4                                                 | 183.4                                     | 176.3                                                  |
| <b>39</b>     | <b>CAAC-IPr</b>               | 68.9                    | 64.2                                    | 65.0                                                 | 70.4                                     | 65.9                                                  | 69.8                                      | 66.0                                                   | 208.1                   | 218.0                                   | 208.1                                                | 217.2                                    | 208.5                                                 | 219.1                                     | 208.4                                                  |
| <b>40</b>     | <b>6-IPr</b>                  | 14.8                    | 8.7                                     | 15.0                                                 | 13.7                                     | 14.0                                                  | 16.9                                      | 17.9                                                   | 186.5                   | 193.6                                   | 186.5                                                | 192.1                                    | 186.0                                                 | 195.4                                     | 187.1                                                  |
| <b>41</b>     | <b>6-NHC<sup>pyr</sup></b>    | 34.9                    | 38.1                                    | 41.5                                                 | 44.0                                     | 41.7                                                  | 42.5                                      | 41.2                                                   | 199.9                   | 208.2                                   | 199.4                                                | 207.7                                    | 200.0                                                 | 209.7                                     | 199.9                                                  |
| <b>42</b>     | <b>CAAC<sup>Menthyl</sup></b> | 56.2                    | 50.2                                    | 52.4                                                 | 55.5                                     | 52.3                                                  | 53.9                                      | 51.5                                                   | 191.3                   | 200.1                                   | 192.2                                                | 199.0                                    | 192.1                                                 | 200.5                                     | 191.7                                                  |
| <b>43</b>     |                               | 126.3 <sup>c</sup>      | 146.2                                   | 138.9                                                | 147.4                                    | 136.3                                                 | 146.8                                     | 136.0                                                  | 217.2                   | 229.7                                   | 218.4                                                | 227.2                                    | 217.5                                                 | 229.3                                     | 217.6                                                  |

|           |       |       |       |              |       |              |       |              |       |       |              |       |              |       |              |
|-----------|-------|-------|-------|--------------|-------|--------------|-------|--------------|-------|-------|--------------|-------|--------------|-------|--------------|
| <b>44</b> |       | -34.9 | -53.1 | <b>-40.7</b> | -46.3 | <b>-40.9</b> | -47.7 | <b>-40.8</b> | 138.5 | 140.5 | <b>139.5</b> | 140.2 | <b>139.3</b> | 141.6 | <b>138.7</b> |
|           | $R^2$ |       | 0.992 | <b>0.992</b> | 0.993 | <b>0.993</b> | 0.993 | <b>0.993</b> |       | 0.985 | <b>0.985</b> | 0.985 | <b>0.985</b> | 0.986 | <b>0.986</b> |
|           | RMSE  |       |       | <b>4.8</b>   |       | <b>4.3</b>   |       | <b>4.3</b>   |       |       | <b>2.2</b>   |       | <b>2.2</b>   |       | <b>2.1</b>   |

<sup>a</sup> data from the ref. [20-21]; <sup>b</sup> scaled; <sup>c</sup> in CDCl<sub>3</sub>; <sup>d</sup> in THF-*d*<sub>8</sub>.

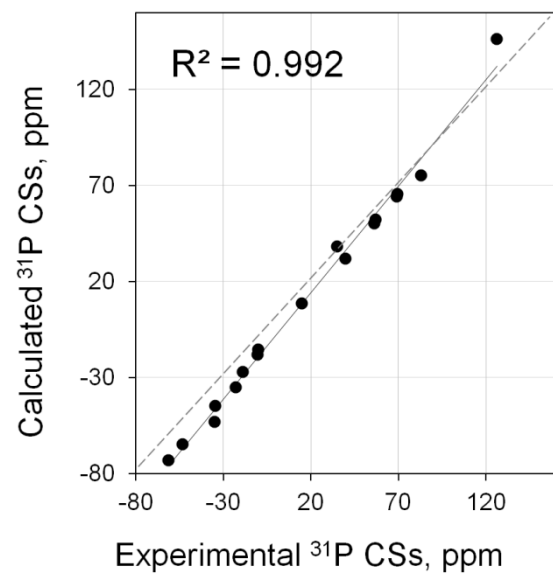

**Figure S5.** Correlation of calculated (PBE0/6-311G(2d,2p)//PBE0/6-31+G(d) level) vs. experimental  $^{31}\text{P}$  NMR shifts for extended set of carbene PPh adducts (**3**·PPh, **5**·PPh, **11**·PPh, **13**·PPh, **25**·PPh-**29**·PPh, **35**·PPh, **37**·PPh, **39**·PPh-**44**·PPh).

**Table S9.** Experimental (in C<sub>6</sub>D<sub>6</sub>) and calculated<sup>a</sup> <sup>13</sup>C NMR shifts (ppm) for set of carbenes (**3**, **5**, **11**, **13**, **25-29**, **35**, **39-44**).

| № of compound | Carbene                       | Exp. <sup>b</sup> | Calc. |              |
|---------------|-------------------------------|-------------------|-------|--------------|
|               |                               |                   |       | scaled       |
| <b>3</b>      | <b>IMes</b>                   | 219.7             | 228.7 | <b>218.5</b> |
| <b>5</b>      | <b>SIMes</b>                  | 243.8             | 258.0 | <b>242.8</b> |
| <b>11</b>     | <b>IPr</b>                    | 220.6             | 229.7 | <b>219.3</b> |
| <b>13</b>     | <b>SIPr</b>                   | 244.0             | 255.4 | <b>240.6</b> |
| <b>25</b>     |                               | 255.5             | 268.7 | <b>251.7</b> |
| <b>26</b>     | <b>ITME</b>                   | 213.7             | 224.3 | <b>214.8</b> |
| <b>27</b>     | <b>I<sup>i</sup>Pr</b>        | 210.5             | 222.4 | <b>213.3</b> |
| <b>28</b>     | <b>ThIPr</b>                  | 254.4             | 269.4 | <b>252.2</b> |
| <b>29</b>     | <b>BI<sup>i</sup>Pr</b>       | 221.6             | 238.6 | <b>226.7</b> |
| <b>35</b>     | <b>CAC-Mes</b>                | 260.56            | 279.0 | <b>260.2</b> |
| <b>39</b>     | <b>CAAC-IPr</b>               | 309.4             | 344.1 | <b>314.2</b> |
| <b>40</b>     | <b>6-Ipr</b>                  | 245.1             | 256.6 | <b>241.6</b> |
| <b>41</b>     | <b>6-NHC<sup>pyr</sup></b>    | 282.0             | 301.7 | <b>279.0</b> |
| <b>42</b>     | <b>CAAC<sup>Menthyl</sup></b> | 319.0             | 348.3 | <b>317.6</b> |
| <b>43</b>     |                               | 330.5             | 368.8 | <b>334.6</b> |
| <b>44</b>     |                               | 185.1             | 192.4 | <b>188.4</b> |
|               | <i>R</i> <sup>2</sup>         |                   | 0.994 | <b>0.994</b> |
|               | <i>RMSE</i>                   |                   |       | <b>3.0</b>   |

<sup>a</sup> at PBE0/6-311G(2d,2p)//PBE0/6-31+G(d) level; <sup>b</sup> data from the ref. [21].



**Table S10.** Experimental (in DMSO-*d*<sub>6</sub> unless otherwise stated) and calculated<sup>*a*</sup> <sup>13</sup>C NMR shifts (ppm) for set of carbene•H<sup>+</sup> azolium salts (**3**•H<sup>+</sup>, **5**•H<sup>+</sup>, **11**•H<sup>+</sup>, **17**•H<sup>+</sup>, **28**•H<sup>+</sup>-**30**•H<sup>+</sup>, **32**•H<sup>+</sup>-**35**•H<sup>+</sup>).

| № of compound               | Carbene                 | Exp. <sup><i>b</i></sup>  | Calc. |              |
|-----------------------------|-------------------------|---------------------------|-------|--------------|
|                             |                         |                           |       | scaled       |
| <b>3</b>                    | <b>IMes</b>             | 139.9 <sup><i>b</i></sup> | 139.3 | <b>139.1</b> |
| <b>5</b>                    | <b>SIMes</b>            | 160.2                     | 164.3 | <b>162.0</b> |
| <b>11</b>                   | <b>IPr</b>              | 139.4                     | 140.4 | <b>140.1</b> |
| <b>17</b>                   | <b>IPr<sup>Cl</sup></b> | 138.4                     | 136.8 | <b>136.8</b> |
| <b>28</b>                   | <b>ThIPr</b>            | 158.5                     | 158.3 | <b>156.5</b> |
| <b>29</b>                   | <b>BI<sup>i</sup>Pr</b> | 140.0                     | 137.9 | <b>137.8</b> |
| <b>30</b>                   | <b>AAC1</b>             | 146.3                     | 151.0 | <b>149.8</b> |
| <b>32</b> (C <sub>a</sub> ) |                         | 155.4                     | 151.1 | <b>149.9</b> |
| <b>32</b> (C <sub>b</sub> ) |                         | 144.4                     | 149.6 | <b>148.5</b> |
| <b>33</b>                   | <b>6-Mes</b>            | 155.6                     | 161.2 | <b>159.1</b> |
| <b>34</b>                   | <b>Trazy</b>            | 154.2                     | 151.7 | <b>150.5</b> |
| <b>35</b>                   | <b>CAC-Mes</b>          | 160.4 <sup><i>b</i></sup> | 164.8 | <b>162.4</b> |
|                             | <i>R</i> <sup>2</sup>   |                           | 0.890 | <b>0.890</b> |
|                             | <i>RMSE</i>             |                           |       | <b>3.0</b>   |

<sup>*a*</sup> at PBE0/6-311G(2d,2p)//PBE0/6-31+G(d) level; <sup>*b*</sup> in CDCl<sub>3</sub>; <sup>*b*</sup> data from the ref. [18].

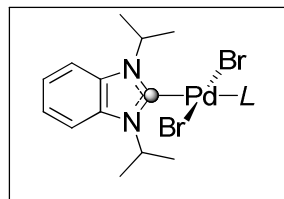

$L = \text{IMes (3)}, \text{SIMes (5)}, \text{IPr (11)}, \text{CH}_3\text{CN (45)}, \text{Py (46)}, \text{Imd (47)}, \text{PPh}_3 \text{ (48)}, \text{P}^i\text{Pr}_3 \text{ (49)}, \text{A (50)}, \text{B (51)}, \text{C (52)}, \text{D (53)}, \text{E (54)}, \text{Indy (55)}, \text{Pyr} \text{ (56)}$

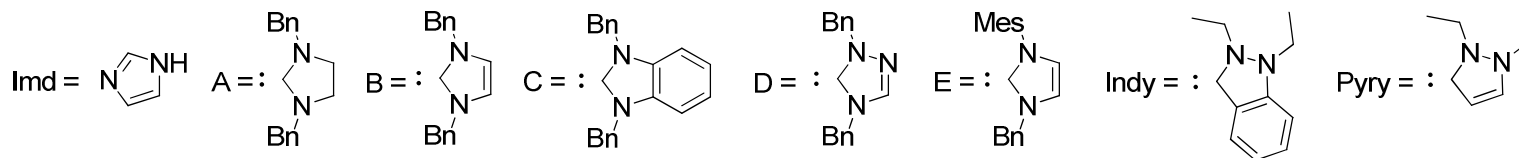

**Figure S6.** Structures of  $[\text{PdBr}_2(\text{iPr}_2\text{-bimy})L]$  complexes.  $L = \mathbf{3}, \mathbf{5}, \mathbf{11}, \mathbf{45-56}$ .

**Table S11.** Experimental (in  $\text{CDCl}_3$ ) and calculated<sup>a</sup>  $^{13}\text{C}$  NMR shifts (ppm) of  $\text{iPr}_2\text{-bimy}$  carbenoid resonances in *trans*-  $[\text{PdBr}_2(\text{iPr}_2\text{-bimy})L]$  complexes.

| No of compound | Carbene ( $L$ )                    | Exp. <sup>b</sup> | Calc. |              |
|----------------|------------------------------------|-------------------|-------|--------------|
|                |                                    |                   |       | scaled       |
| <b>3</b>       | <b>IMes</b>                        | 177.2             | 187.4 | <b>160.1</b> |
| <b>5</b>       | <b>SIMes</b>                       | 177.6             | 188.2 | <b>161.3</b> |
| <b>11</b>      | <b>IPr</b>                         | 177.5             | 188.5 | <b>160.1</b> |
| <b>45</b>      | <b>CH<sub>3</sub>CN</b>            | 158.4             | 173.7 | <b>172.1</b> |
| <b>46</b>      | <b>Py</b>                          | 160.0             | 173.7 | <b>172.2</b> |
| <b>47</b>      | <b>Imd</b>                         | 161.4             | 174.8 | <b>177.4</b> |
| <b>48</b>      | <b>PPh<sub>3</sub></b>             | 173.1             | 184.5 | <b>179.5</b> |
| <b>49</b>      | <b>P<sup>i</sup>Pr<sub>3</sub></b> | 175.9             | 184.6 | <b>183.2</b> |
| <b>50</b>      | <b>A</b>                           | 180.1             | 193.2 | <b>184.4</b> |
| <b>51</b>      | <b>B</b>                           | 179.0             | 191.2 | <b>181.8</b> |
| <b>52</b>      | <b>C</b>                           | 178.3             | 191.0 | <b>179.2</b> |
| <b>53</b>      | <b>D</b>                           | 176.6             | 189.3 | <b>178.2</b> |
| <b>54</b>      | <b>E</b>                           | 178.3             | 190.1 | <b>175.3</b> |
| <b>55</b>      | <b>Indy</b>                        | 181.6             | 194.5 | <b>176.1</b> |
| <b>56</b>      | <b>Pyr</b>                         | 182.4             | 195.6 | <b>176.5</b> |
|                | $R^2$                              |                   | 0.961 | <b>0.961</b> |
|                | RMSE                               |                   |       | <b>1.6</b>   |

<sup>a</sup>4c-mDKS:PBE0/{ucc-pvtz+ucc-pvdz;Pd(dyall-vdz)}//KS:PBE0/{6-31+G(d);Pd(SDD)} level; <sup>b</sup> data from the ref. [15-16].
